# Supplementary material for: Molecular identification of Trypanosoma brucei gambiense in naturally infected pigs, dogs and small ruminants confirms domestic animals as potential reservoirs for sleeping sickness in Chad
Source: PubMed Central journal article supplement (PMC7673351; doi:10.1051/parasite/2020061), 2020-11-18
Supplement: parasite-27-63-s1.pdf [file parasite-27-63-s1.pdf]

Table S1: Trypanosome infections according to villages of each HAT focus

| HAT foci | Villages      | HAT Cases | NE | RDT* | T+ | PCR results     |                  |
|----------|---------------|-----------|----|------|----|-----------------|------------------|
|          |               |           |    |      |    | TB <sup>+</sup> | TBG <sup>+</sup> |
| Mandoul  | Bembaitada    | No        | 15 | 6    | 1  | 4               | 1                |
|          | Bekolo        | No        | 8  | 0    | 0  | 0               | 0                |
|          | BNK           | No        | 6  | 2    | 0  | 1               | 0                |
|          | Kokoumati II  | Yes       | 8  | 3    | 2  | 2               | 1                |
|          | Kobitoye      | Yes       | 10 | 3    | 1  | 4               | 2                |
|          | Koumouabé     | No        | 12 | 5    | 2  | 1               | 1                |
|          | Ngonbé        | No        | 5  | 0    | 0  | 0               | 0                |
|          | Kokoumati I   | Yes       | 9  | 0    | 1  | 3               | 2                |
|          | Bekonon       | No        | 7  | 2    | 0  | 2               | 0                |
|          | Beyama II     | No        | 5  | 0    | 1  | 0               | 0                |
|          | Bemadja       | No        | 7  | 1    | 0  | 2               | 0                |
|          | Ndosadana     | No        | 6  | 0    | 0  | 0               | 0                |
|          | Koumaingar    | No        | 7  | 2    | 0  | 0               | 0                |
|          | Betoyo        | No        | 4  | 0    | 1  | 0               | 0                |
|          | Missimadji    | No        | 5  | 1    | 0  | 2               | 0                |
|          | Sanodjo       | No        | 8  | 3    | 1  | 3               | 1                |
|          | Kouhsamadja   | No        | 8  | 1    | 0  | 0               | 0                |
|          | Sanodjo Koh   | No        | 5  | 1    | 0  | 2               | 0                |
|          | Berayan       | No        | 9  | 0    | 0  | 1               | 1                |
|          | Beidé II      | No        | 4  | 0    | 0  | 0               | 0                |
|          | Takawa        | No        | 6  | 0    | 1  | 1               | 0                |
|          | Beda          | No        | 5  | 0    | 0  | 0               | 0                |
|          | Ndohsako      | Yes       | 9  | 4    | 2  | 4               | 1                |
|          | Palkoyo       | Yes       | 10 | 5    | 2  | 3               | 1                |
|          | Ndosalte      | No        | 6  | 1    | 1  | 1               | 0                |
|          | Sananga       | No        | 7  | 0    | 0  | 0               | 0                |
|          | Djaraïbé      | No        | 5  | 1    | 0  | 0               | 0                |
|          | Dankou        | No        | 4  | 0    | 0  | 0               | 0                |
|          | Betel         | No        | 6  | 1    | 0  | 0               | 0                |
|          | Jerusalem I   | No        | 3  | 0    | 0  | 1               | 0                |
|          | Ndoayo        | No        | 7  | 0    | 1  | 0               | 0                |
|          | Danmadja      | No        | 14 | 3    | 2  | 3               | 1                |
|          | Benadja       | No        | 5  | 1    | 0  | 0               | 0                |
|          | Bessakoian    | No        | 4  | 0    | 0  | 0               | 0                |
|          | Donditi       | No        | 3  | 0    | 0  | 0               | 0                |
|          | Dedaye I      | No        | 6  | 1    | 0  | 0               | 0                |
|          | Bekili        | No        | 4  | 0    | 0  | 0               | 0                |
|          | Jerusalem II  | No        | 5  | 1    | 1  | 1               | 0                |
|          | Bedoné        | No        | 5  | 1    | 0  | 2               | 0                |
|          | Jerusalem III | No        | 6  | 2    | 0  | 0               | 0                |
|          | Subtotal 1    | 41        |    | 268  | 51 | 20              | 43               |
|          | Kobdjogué I   | Yes       | 14 | 5    | 2  | 8               | 1                |

|            |               |     |     |    |    |    |   |
|------------|---------------|-----|-----|----|----|----|---|
| Maro       | Mbimbagué     | No  | 5   | 1  | 0  | 0  | 0 |
|            | Ferme Taguina | No  | 9   | 2  | 1  | 6  | 1 |
|            | Mobiri        | No  | 5   | 0  | 1  | 2  | 0 |
|            | Sandana       | No  | 7   | 0  | 1  | 0  | 0 |
|            | Kobdjogué II  | No  | 10  | 2  | 1  | 5  | 0 |
|            | Bekion        | No  | 5   | 1  | 0  | 2  | 0 |
|            | Koukourouza   | No  | 7   | 2  | 1  | 3  | 1 |
|            | Dangala       | No  | 4   | 0  | 0  | 0  | 0 |
|            | Sanodjo       | No  | 9   | 0  | 1  | 1  | 0 |
|            | Kion Ngala    | No  | 5   | 1  | 0  | 0  | 0 |
|            | Doro          | No  | 6   | 1  | 1  | 2  | 0 |
|            | Morko         | No  | 4   | 1  | 0  | 0  | 0 |
|            | Ngon Molo     | No  | 5   | 0  | 0  | 0  | 0 |
|            | Ferme Mbaye   | No  | 8   | 2  | 1  | 2  | 0 |
|            | Kaounodjo     | No  | 11  | 4  | 1  | 4  | 0 |
|            | Mouri         | No  | 6   | 0  | 1  | 1  | 0 |
|            | Baguirgué I   | No  | 8   | 3  | 2  | 0  | 0 |
|            | Baguirgué II  | No  | 5   | 1  | 0  | 0  | 0 |
|            | Irnan         | No  | 11  | 3  | 1  | 4  | 0 |
|            | Gourourou     | Yes | 16  | 5  | 2  | 9  | 1 |
|            | Kira          | No  | 4   | 1  | 0  | 0  | 0 |
|            | Ngon kira     | No  | 6   | 0  | 0  | 0  | 0 |
|            | Sanodjo II    | No  | 8   | 2  | 1  | 0  | 0 |
|            | Morkon II     | No  | 6   | 0  | 0  | 0  | 0 |
|            | Guirkyon      | No  | 10  | 2  | 1  | 0  |   |
|            | Maikava       | No  | 12  | 3  | 1  | 0  | 0 |
|            | Ndjinaba      | No  | 5   | 0  | 0  | 0  | 0 |
| Bekanan    | No            | 6   | 1   | 1  | 1  | 0  |   |
| Ngakorio   | No            | 9   | 0   | 0  | 0  | 0  |   |
| Molo       | No            | 6   | 1   | 1  | 1  | 0  |   |
| Subtotal 2 | 31            |     | 232 | 44 | 22 | 51 | 4 |
| Moissala   | Gonhongon     | No  | 8   | 2  | 2  | 5  | 0 |
|            | Lapia         | Yes | 9   | 3  | 2  | 7  | 1 |
|            | Maikolo       | No  | 4   | 0  | 0  | 0  | 0 |
|            | Moundou       | No  | 4   | 1  | 1  | 3  | 0 |
|            | Dororo        | No  | 8   | 1  | 1  | 5  | 0 |
|            | Effort        | No  | 3   | 2  | 0  | 1  | 0 |
|            | Samadja       | No  | 6   | 3  | 0  | 0  | 0 |
|            | Kougarte      | No  | 5   | 1  | 1  | 3  | 0 |
|            | Kadkou I      | No  | 4   | 1  | 0  | 2  | 0 |
|            | Dodjite       | No  | 3   | 0  | 0  | 0  | 0 |
|            | Ndoyo         | No  | 3   | 0  | 0  | 0  | 0 |
|            | Paris Dakar   | No  | 4   | 0  | 1  | 2  | 0 |
|            | Betoyo        | No  | 3   | 0  | 0  | 0  | 0 |
|            | Bepan II      | No  | 5   | 3  | 0  | 3  | 0 |
|            | Kokoyote      | No  | 4   | 1  | 0  | 2  | 0 |
| Berigui    | No            | 3   | 0   | 0  | 0  | 0  |   |
| Sananga    | No            | 3   | 1   | 0  | 0  | 0  |   |

|              |            |     |            |            |           |            |           |
|--------------|------------|-----|------------|------------|-----------|------------|-----------|
|              | Bekodo     | No  | 4          | 1          | 1         | 2          | 0         |
|              | Ngokan II  | No  | 3          | 0          | 0         | 1          | 0         |
|              | Mosbé      | No  | 4          | 0          | 0         | 0          | 0         |
|              | Doh Mbanga | No  | 3          | 0          | 0         | 0          | 0         |
|              | Takaouti   | No  | 3          | 1          | 1         | 1          | 0         |
|              | Kadkou II  | No  | 5          | 2          | 1         | 2          | 0         |
|              | Béka       | No  | 3          | 0          | 0         | 0          | 0         |
|              | Sahoyo     | No  | 3          | 0          | 0         | 0          | 0         |
|              | Bepili     | No  | 7          | 2          | 1         | 4          | 0         |
|              | Ndilbé     | No  | 3          | 0          | 0         | 0          | 0         |
|              | Bendogo    | No  | 3          | 0          | 0         | 0          | 0         |
|              | Dokaouti   | No  | 5          | 0          | 1         | 2          | 0         |
|              | Koudoti    | No  | 4          | 0          | 0         | 0          | 0         |
|              | Brakaba I  | No  | 4          | 2          | 0         | 0          | 0         |
|              | Brakaba II | No  | 3          | 1          | 1         | 2          | 0         |
|              | Beguina    | No  | 2          | 0          | 0         | 0          | 0         |
|              | Bendanga   | No  | 3          | 0          | 0         | 0          | 0         |
|              | Nanmadja   | Yes | 7          | 3          | 2         | 5          | 1         |
|              | Kokoumati  | No  | 4          | 1          | 0         | 1          | 0         |
|              | Koubraza   | No  | 4          | 1          | 1         | 2          | 0         |
|              | Kana       | No  | 3          | 0          | 0         | 0          | 0         |
|              | Degaulle   | No  | 4          | 1          | 0         | 0          | 0         |
|              | Mayo       | No  | 3          | 1          | 1         | 1          | 0         |
|              | Maininga   | No  | 3          | 0          | 0         | 0          | 0         |
| Subtotal 3   | 41         |     | 169        | 35         | 18        | 56         | 2         |
| <b>Total</b> | <b>113</b> |     | <b>669</b> | <b>130</b> | <b>60</b> | <b>150</b> | <b>18</b> |

HAT: Human African Trypanosomiasis; NE: Number of animals examined; RDT: Rapid diagnosis test; T+: trypanosome infections revealed by Capillary tube centrifugation; TB+: trypanosomes of the subgenus *Trypanozoon*; TBG: *Trypanosoma brucei gambiense*.
